# Supplementary material
Source: Springer Nature journal article supplement (https://www.springermedizin.de/resource/supplementary/12936_2011_1896_MOESM5_ESM.pdf/9541996)

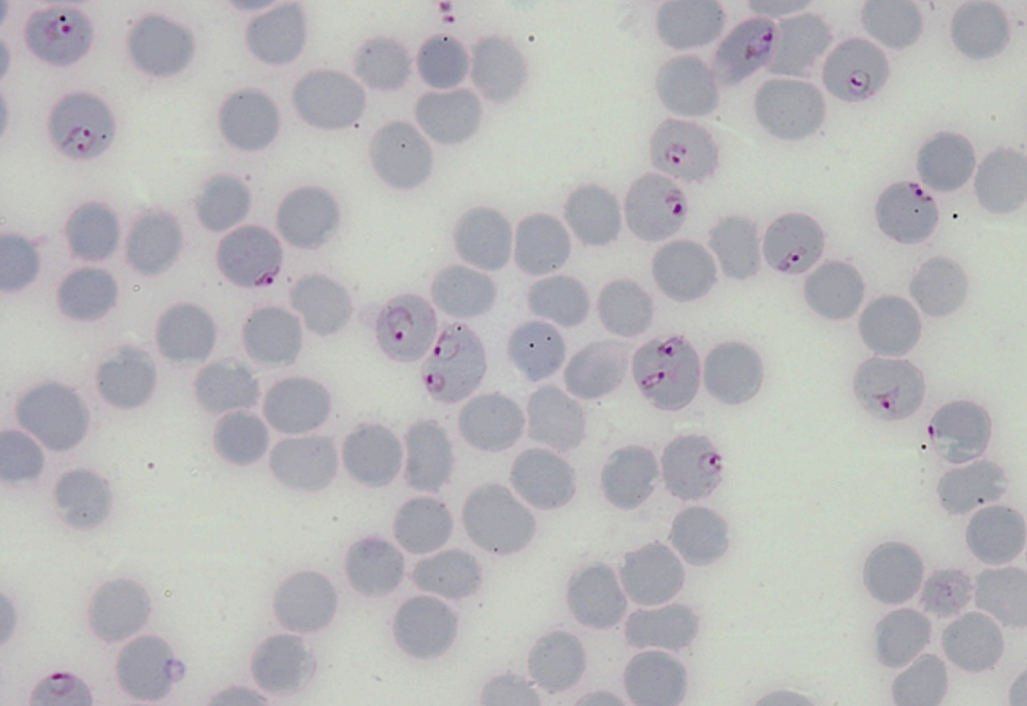

Supplement: MOESM5 [file 9541996]
